# Supplementary material for: Tissue Proteome of 2-Hydroxyacyl-CoA Lyase Deficient Mice Reveals Peroxisome Proliferation and Activation of ω-Oxidation
Source: MDPI journal article supplement (doi:10.3390/ijms23020987), 2022-01-17
Supplement: s1 [file s1]

## SUPPLEMENTARY INFORMATION

### **Tissue Proteome of 2-hydroxyacyl-CoA lyase deficient mice reveals peroxisome proliferation and activation of $\omega$ -oxidation**

Youssef Khalil<sup>1</sup>, Sara Carrino<sup>1,2</sup>, Fujun Lin<sup>3,4</sup>, Anna Ferlin<sup>3,5</sup>, Heena V Lad<sup>6</sup>, Francesca Mazzacuva<sup>1,7</sup>, Sara Falcone<sup>6</sup>, Natalie Rivers<sup>6</sup>, Gareth Banks<sup>6</sup>, Danilo Concas<sup>6</sup>, Carlos Aguilar<sup>6</sup>, Andrew R Haynes<sup>6</sup>, Andy Blease<sup>6</sup>, Thomas Nicol<sup>6</sup>, Raya Al-Shawi<sup>8</sup>, Wendy Heywood<sup>1</sup>, Paul Potter<sup>6</sup>, Kevin Mills<sup>1</sup>, Daniel P Gale<sup>3†</sup>, Peter T Clayton<sup>1†\*</sup>

<sup>1</sup>*Genetics and Genomic Medicine, Great Ormond Street Institute of Child Health, University College London, London WC1N 1EH, UK*

<sup>2</sup>*Department of Experimental, Diagnostic and Specialty Medicine, University of Bologna, Bologna 40138, Italy*

<sup>3</sup>*Department of Renal Medicine, University College London, London, NW3 2PF, UK*

<sup>4</sup>*Department of Nephrology, Xin Hua Hospital, School of Medicine, Shanghai Jiao Tong University, Shanghai, China*

<sup>5</sup>*Clinical Genetics and Genomics Laboratory, Royal Brompton Hospital, London SW3 6NP, UK*

<sup>6</sup>*MRC Harwell Institute, Harwell Campus, Oxfordshire, OX11 0RD, UK*

<sup>7</sup>*Department of Bioscience, University of East London, London E15 4LZ, UK*

<sup>8</sup>*Genetics Unit and Wolfson Drug Discovery Unit, Centre for Amyloidosis and Acute Phase Proteins, University College London, London, UK.*

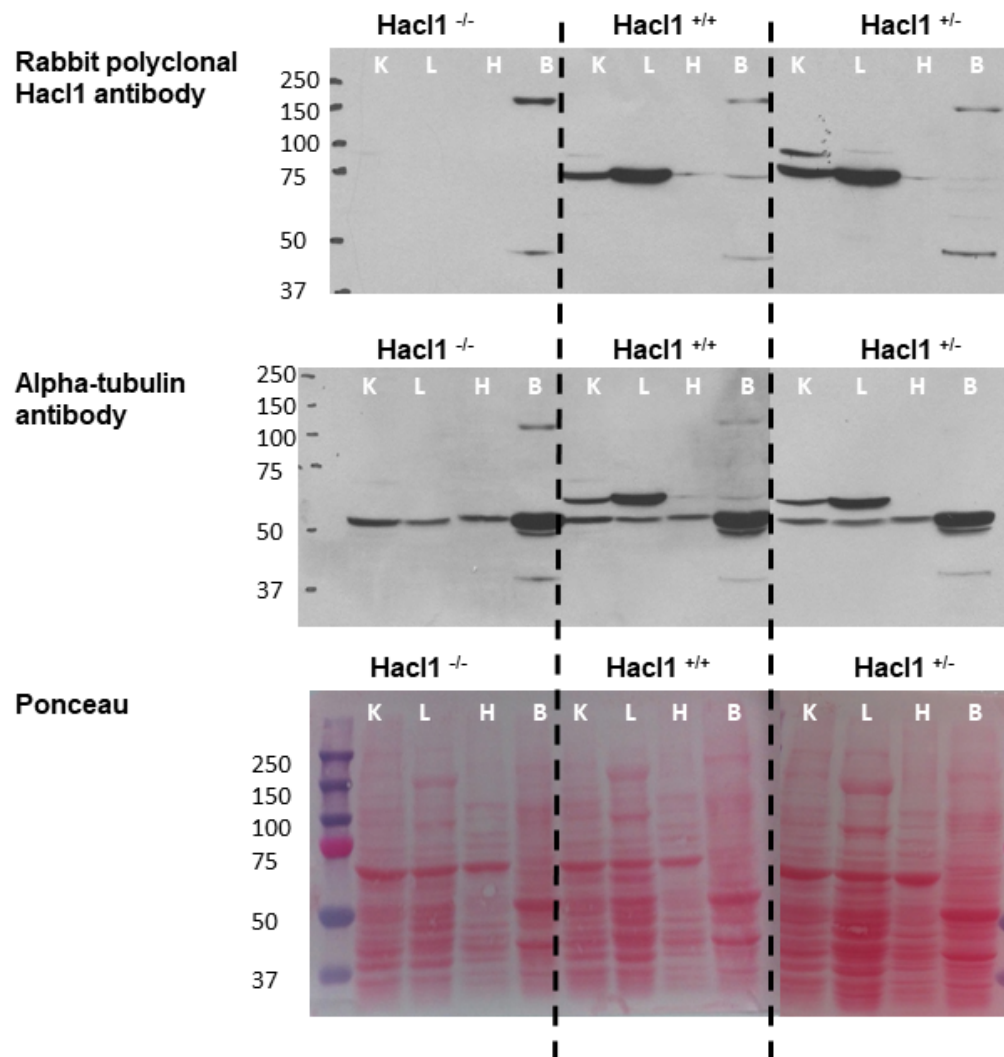

Figure S1. Western blots of mouse tissues. Hacl1 protein was not detected in knockout mouse tissue homogenates. K, Kidney; L, Liver; H, Heart; B, Brain

A

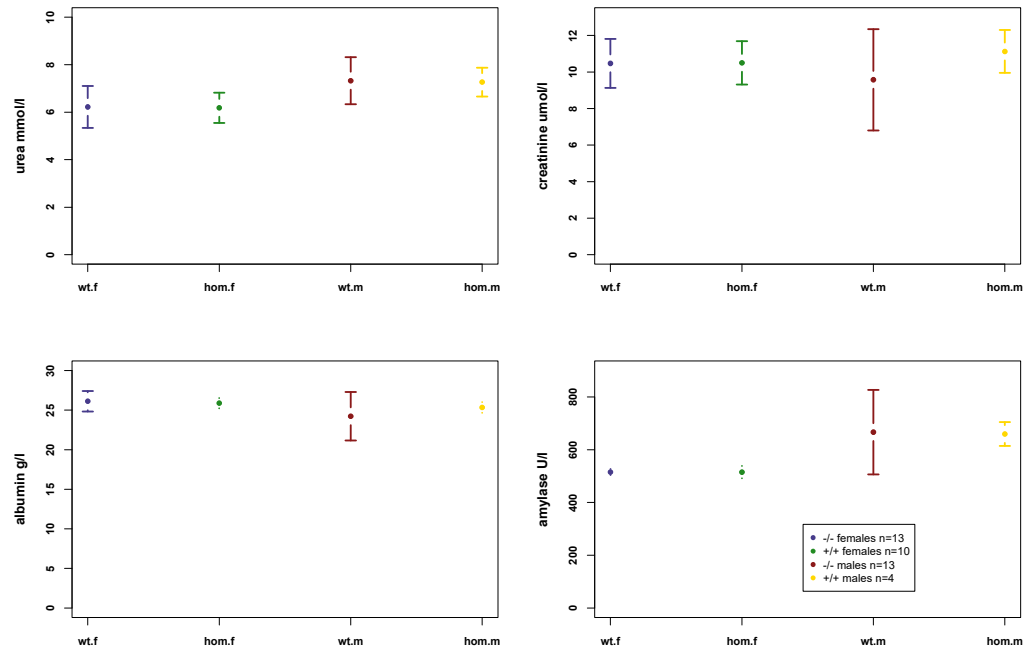

B

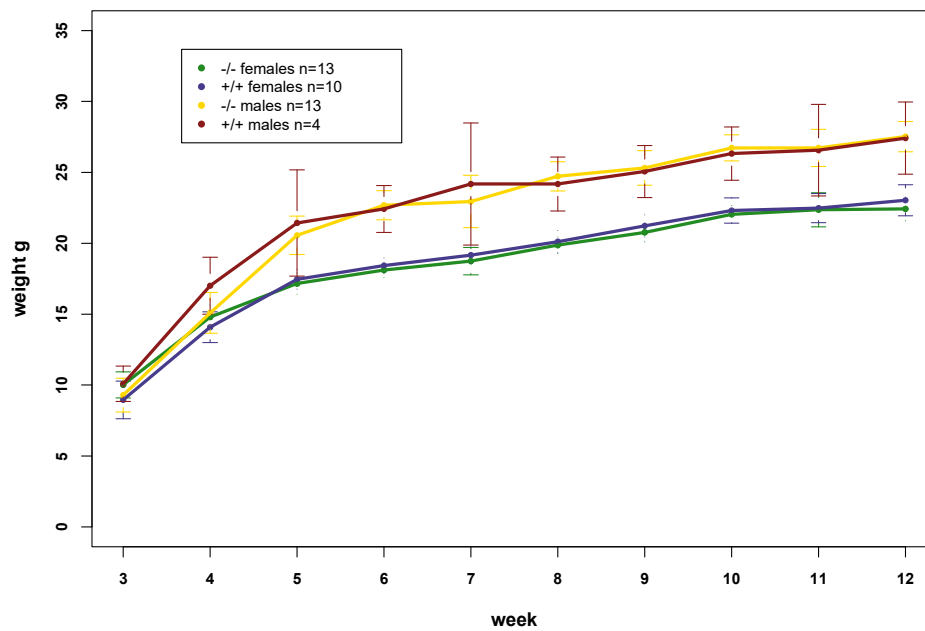

Figure S2. No differences in A) serum urea, creatinine, amylase or urine protein or B) body weight were observed between wild type and *Hac11*<sup>-/-</sup> animals.

A

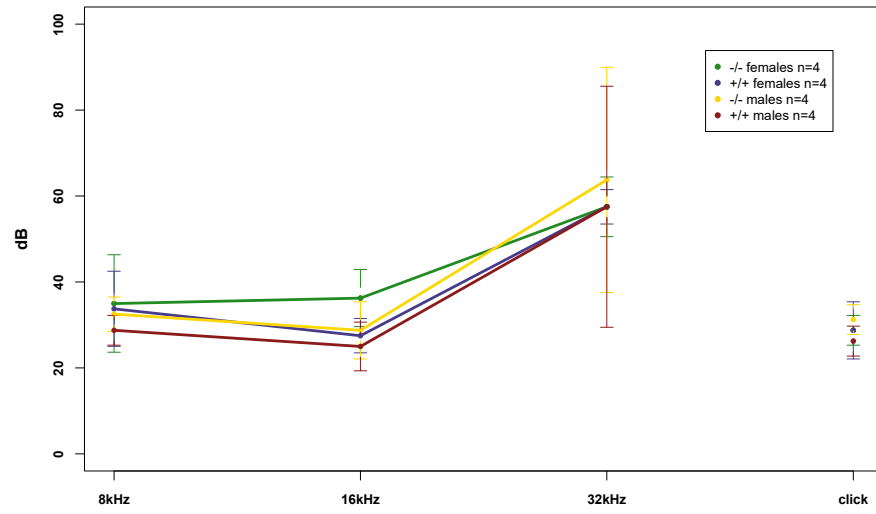

B

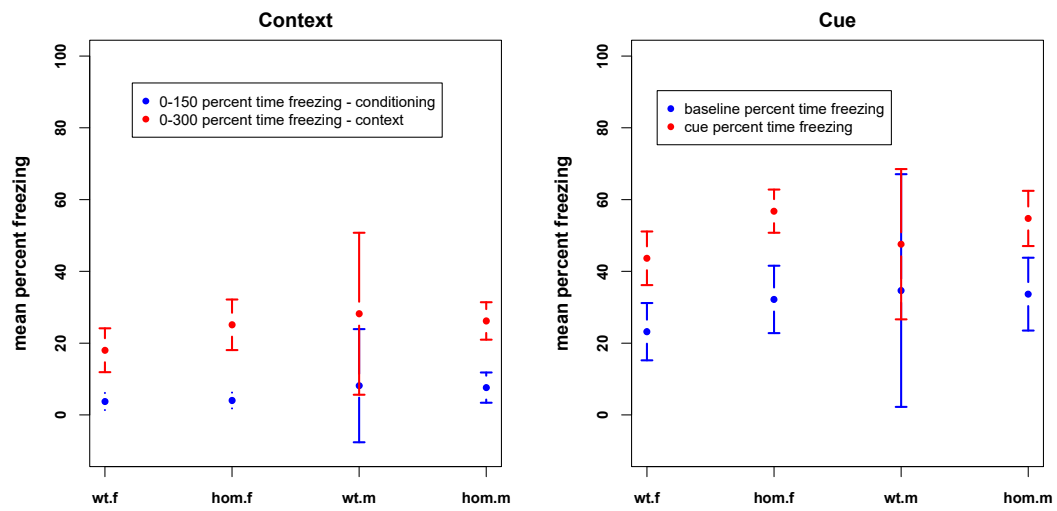

C

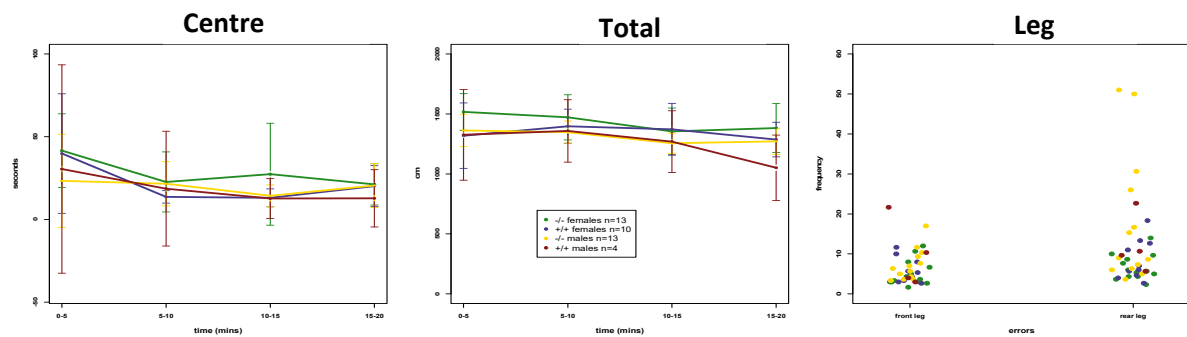

Figure S3. No differences in A) acoustic brainstem responses, B) fear conditioning responses or C) locomotor activity were observed between wild type and *Hac11*<sup>-/-</sup> animals.

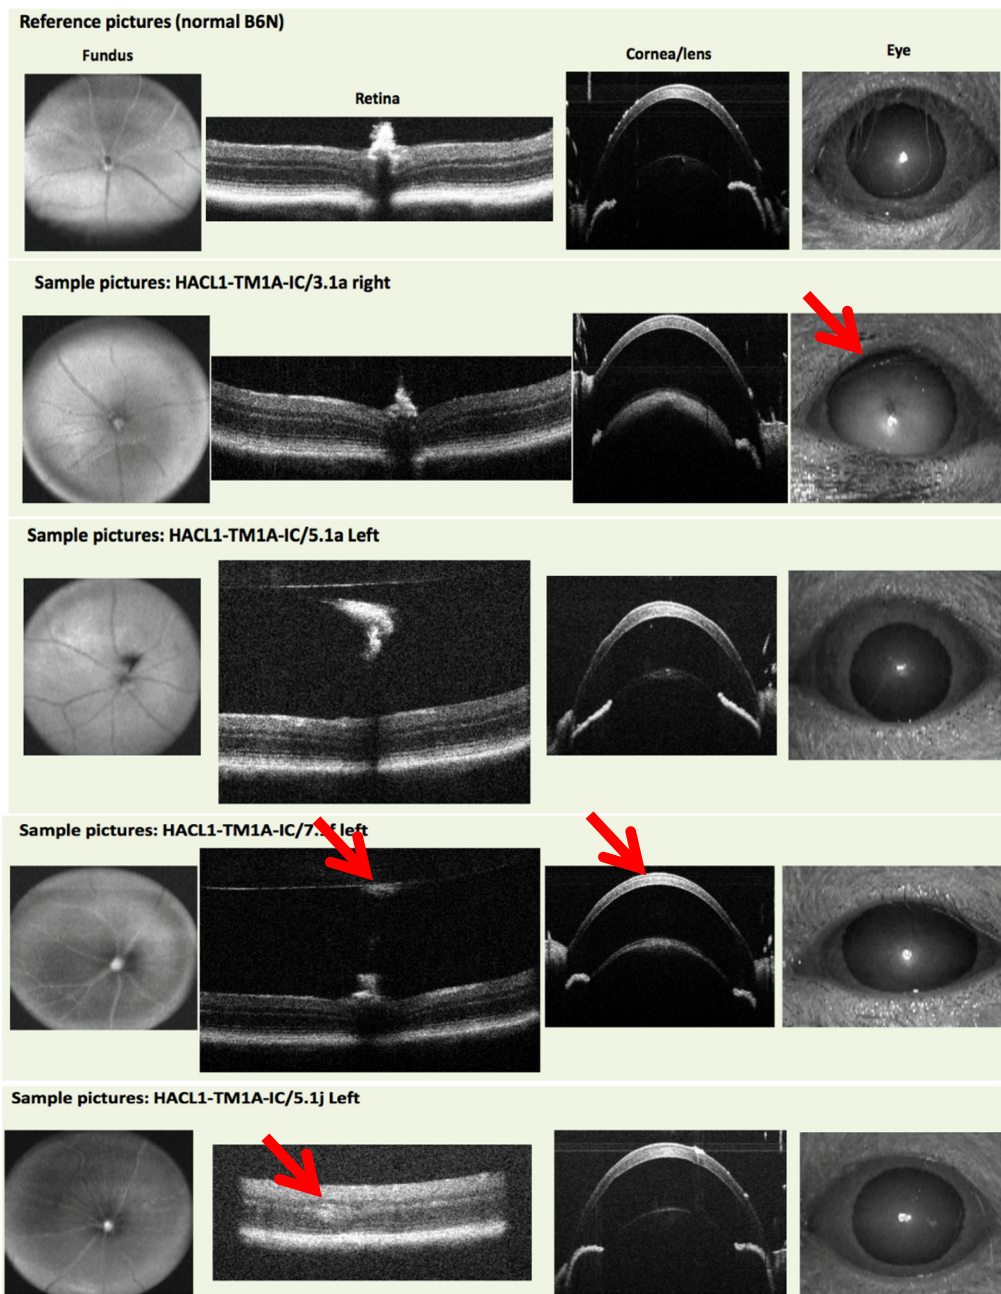

Figure S4. Representative examples of optical coherence tomography showing abnormalities (arrows) that were observed in both knockout than wild type animals.

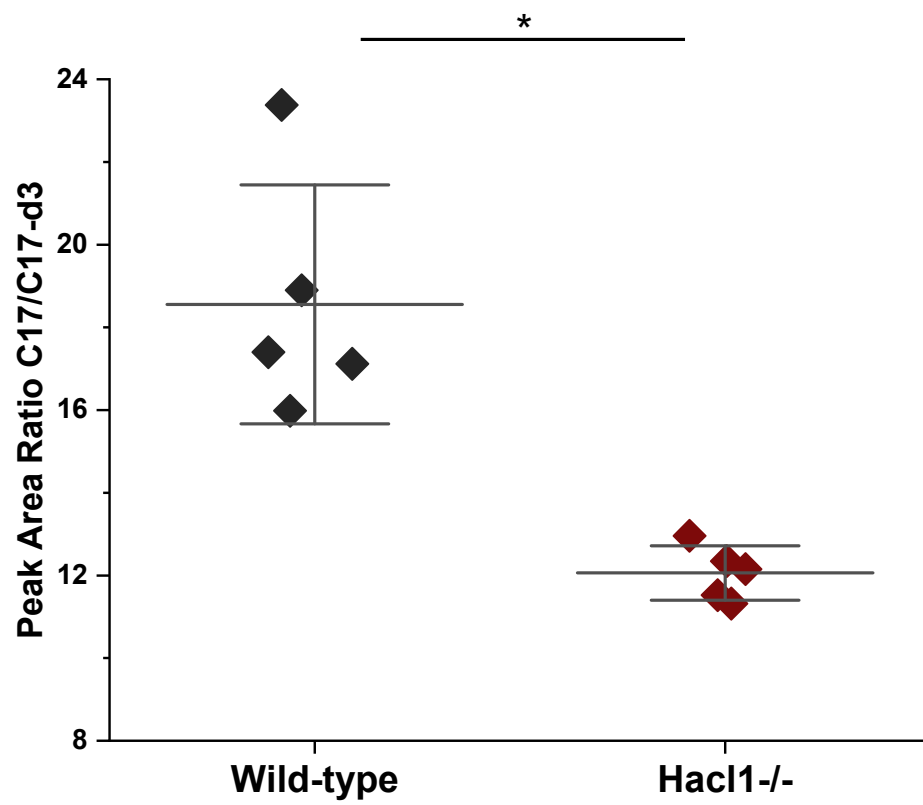

Figure S5. Liver heptadecanoic acid presented as peak area ratio with d3-heptadecanoic acid internal standard. Heptadecanoic acid is significantly reduced in *Hacl1*<sup>-/-</sup> liver (P<0.01).

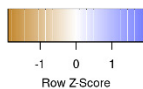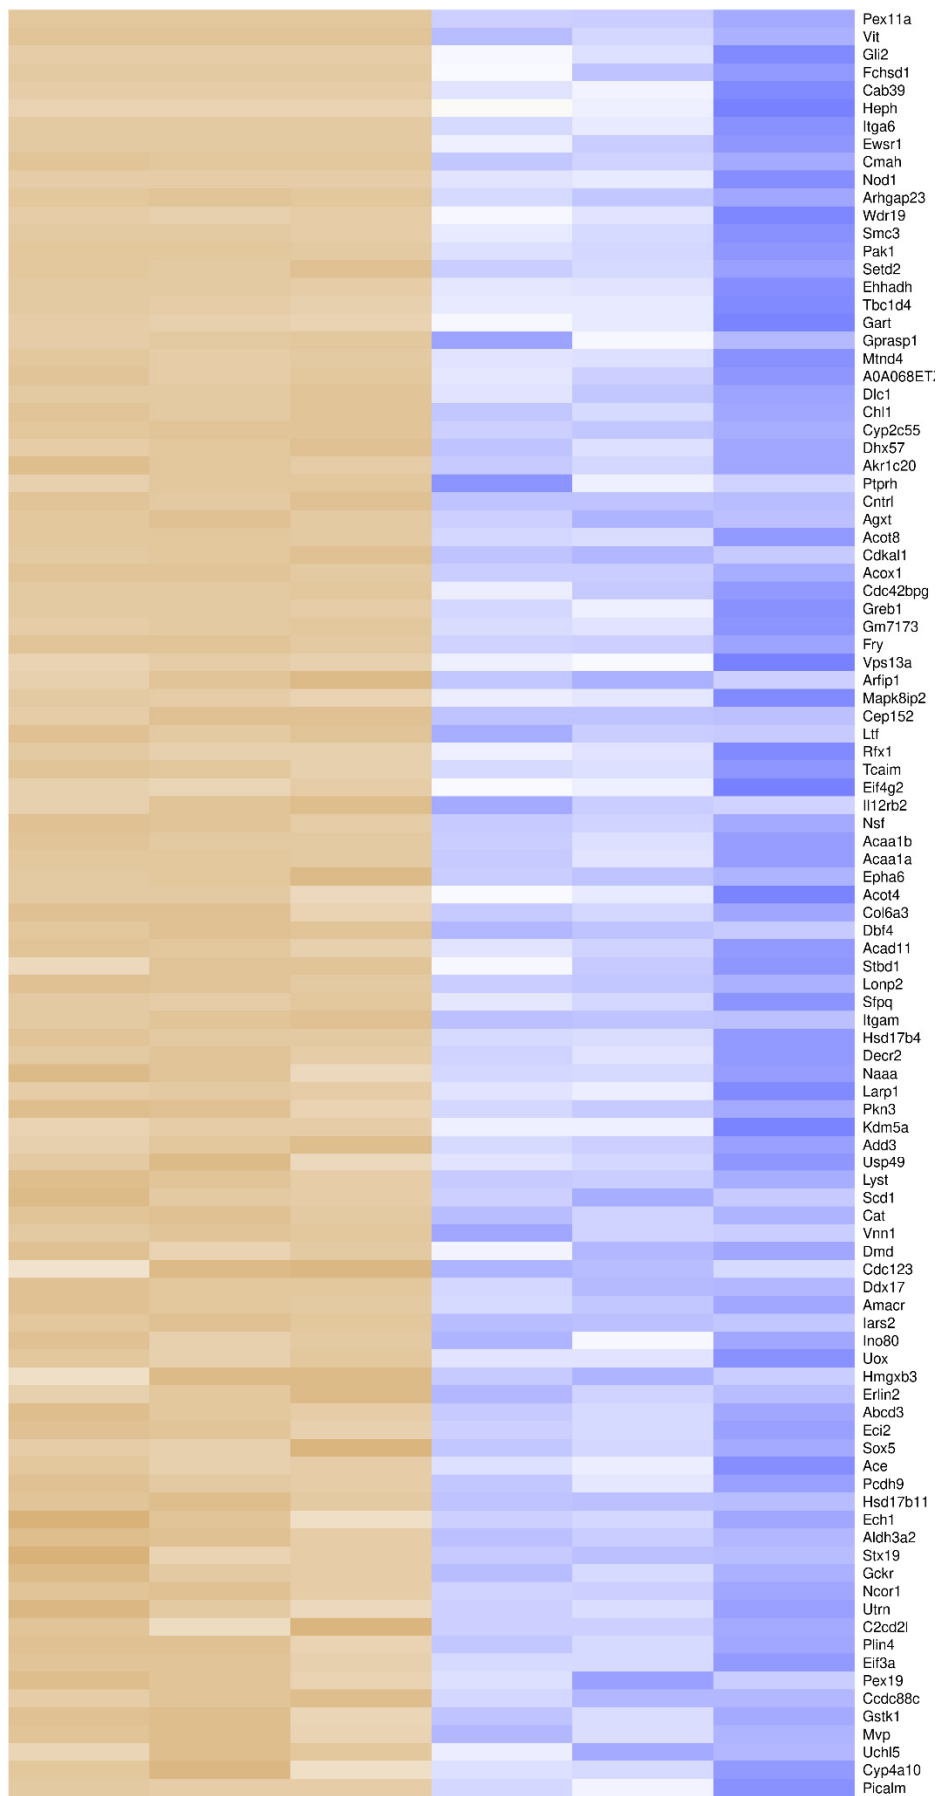

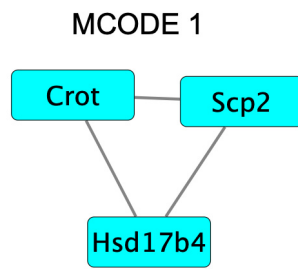

MCODE\_1 R-MMU-389887 Beta-oxidation of pristanoyl-CoA  
MCODE\_1 R-MMU-390918 Peroxisomal lipid metabolism  
MCODE\_1 R-MMU-9033241 Peroxisomal protein import

Figure S7. Protein-protein interaction network in *Hacl1*<sup>-/-</sup> mouse kidney
